# Supplementary material for: NUDT2 initiates viral RNA degradation by removal of 5′-phosphates
Source: Springer Nature journal article supplement (doi:10.1038/s41467-021-27239-y), 2021-11-25
Supplement: MOESM1 [file 41467_2021_27239_MOESM1_ESM.pdf]

# Supplementary Figure 1

a

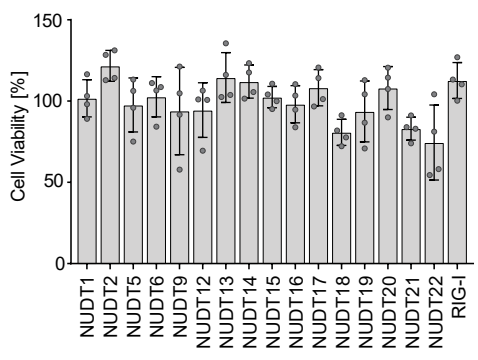

b

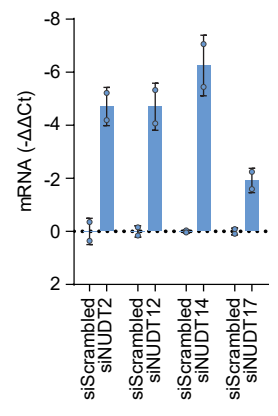

c

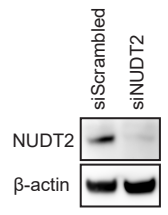

**Supplementary Figure 1 | Cell viability after NUDT depletion and confirmation of knockdown.** (a) Cell viability after siRNA knockdown. 72 h after siRNA transfection into HeLa cells, cell viability was tested using a cell titer glow assay. Relative cell viability was assessed by assuming the average cell viability of the whole siRNA screen set as 100% viable. The graph shows an average of four independent experiments done in technical duplicates  $\pm$  SD. (b) Cells were treated with siRNA targeting the transcript of *NUDT2*, *NUDT12*, *NUDT14*, *NUDT17*, or control (siScrambled), and mRNA abundance of the respective cellular targets was quantified using RT-qPCR normalized to GAPDH. Bar graphs show the mean fold change of the targeted sequence vs. control  $\pm$  SD of two independent replicates. (c) Expression of NUDT2 in cells transfected with siNUDT2 or control (siScrambled) assessed by western blotting.



**Supplementary Figure 2 | NUDT2 localization and cross-species sequence alignment.** (a) Coomassie-stained SDS-PAGE of His6-MBP-tagged recombinant Nudix hydrolases, including mutants bearing point mutations in the catalytic Nudix box (n = 1). (b) Total mass determination of NUDT2 by top-down LC-MS analysis, including the total ion current chromatogram (TIC, top) and the extracted ion chromatogram (bottom). (c) Sequence alignment of NUDT2 proteins from *Homo sapiens*, *Danio rerio*, *Caenorhabditis elegans*, *Mus musculus*, *Xenopus laevis*, *Gallus gallus*, and *Drosophila melanogaster*. Colors are depicted as following: red box, white character shows a strict identity of residues; red character shows a similarity in a group; a blue frame shows similarities across groups.

# Supplementary Figure 3

a

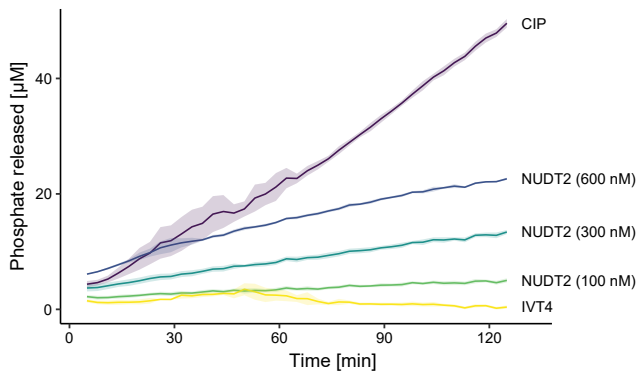

c

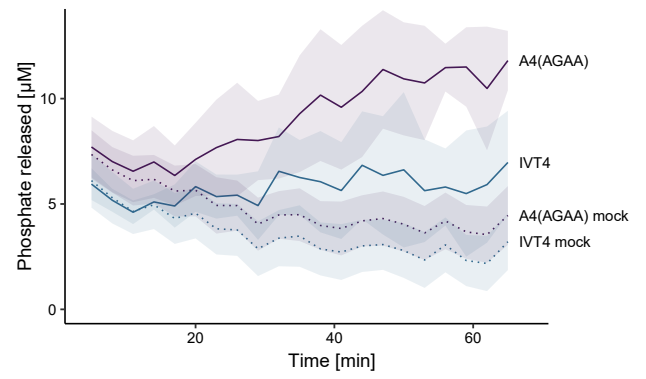

b

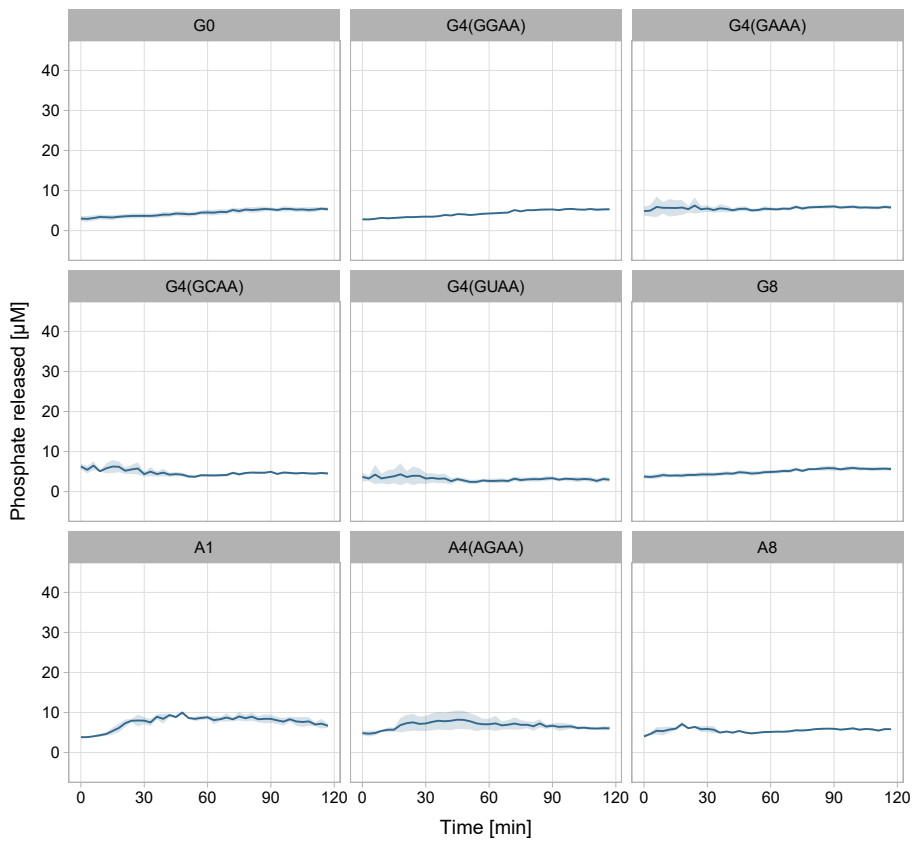

**Supplementary Figure 3 | Time-resolved phosphate release assay. (a)** Time-resolved EnzChek assay to quantify released phosphate from incubated IVT4 RNA with different concentrations of NUDT2. Spectrophotometric measurements of the samples were performed every 3 min. The line graph shows the mean of three independent experiments with the ribbon indicating  $\pm$  SD. **(b)** Complementary to Fig. 3c. RNA substrates depicted in Fig. 3b were incubated with NUDT2 E58A mutant at a concentration of 600 nM over a time-course of 2 h utilizing the EnzChek assay to quantify phosphate release. Spectrophotometric measurements were performed every 3 min. The line graph shows the mean of three independent experiments with the ribbon indicating  $\pm$  SD. **(c)** As (a) but using RppH to dephosphorylate an RNA substrate which is base-paired on its 5'-end (IVT4) and one that has an unpaired 5'-overhang (A4(AGAA)) in comparison to untreated RNA substrates. The line graph shows the mean of three independent experiments with the ribbon indicating  $\pm$  SD.

# Supplementary Figure 4

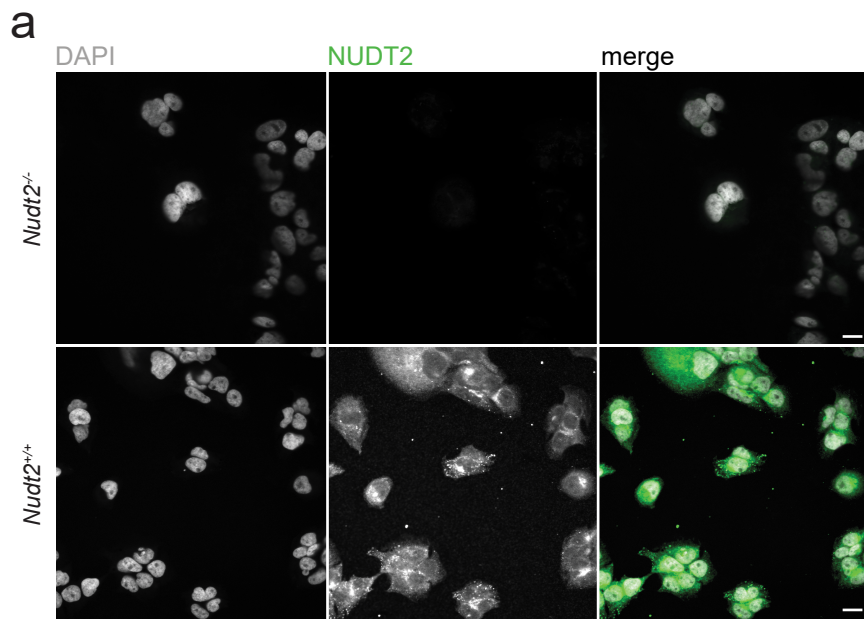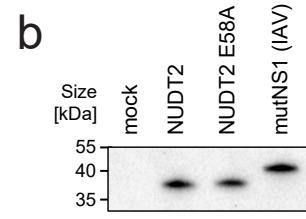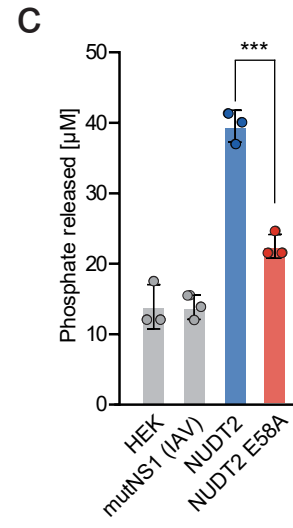

**Supplementary Figure 4 | Human NUDT2 subcellular localization and function.** (a) Huh7.5 and Huh7.5 deficient for NUDT2 cells were stained for NUDT2 and analyzed by confocal microscopy. Representative images of three biological repeats are shown. The scale bars represent 10  $\mu\text{m}$ . (b) HEK293T cells were transfected with plasmids encoding Myc-tagged NUDT2, NUDT2 E58A, and the control mutNS1 (IAV) or left untransfected (mock). Myc-tagged proteins were precipitated, and precipitation efficiency was evaluated by western blotting against Myc. (c) Precipitates from (b) were incubated with PPP-RNA (IVT4) for 3 h and phosphate release evaluated using a malachite green assay. Bar graphs show the mean of three independent replicates  $\pm$  SD, \*\*\*  $p < 0.001$  as analyzed by nonparametric two-tailed t-test.



# Supplementary Figure 5

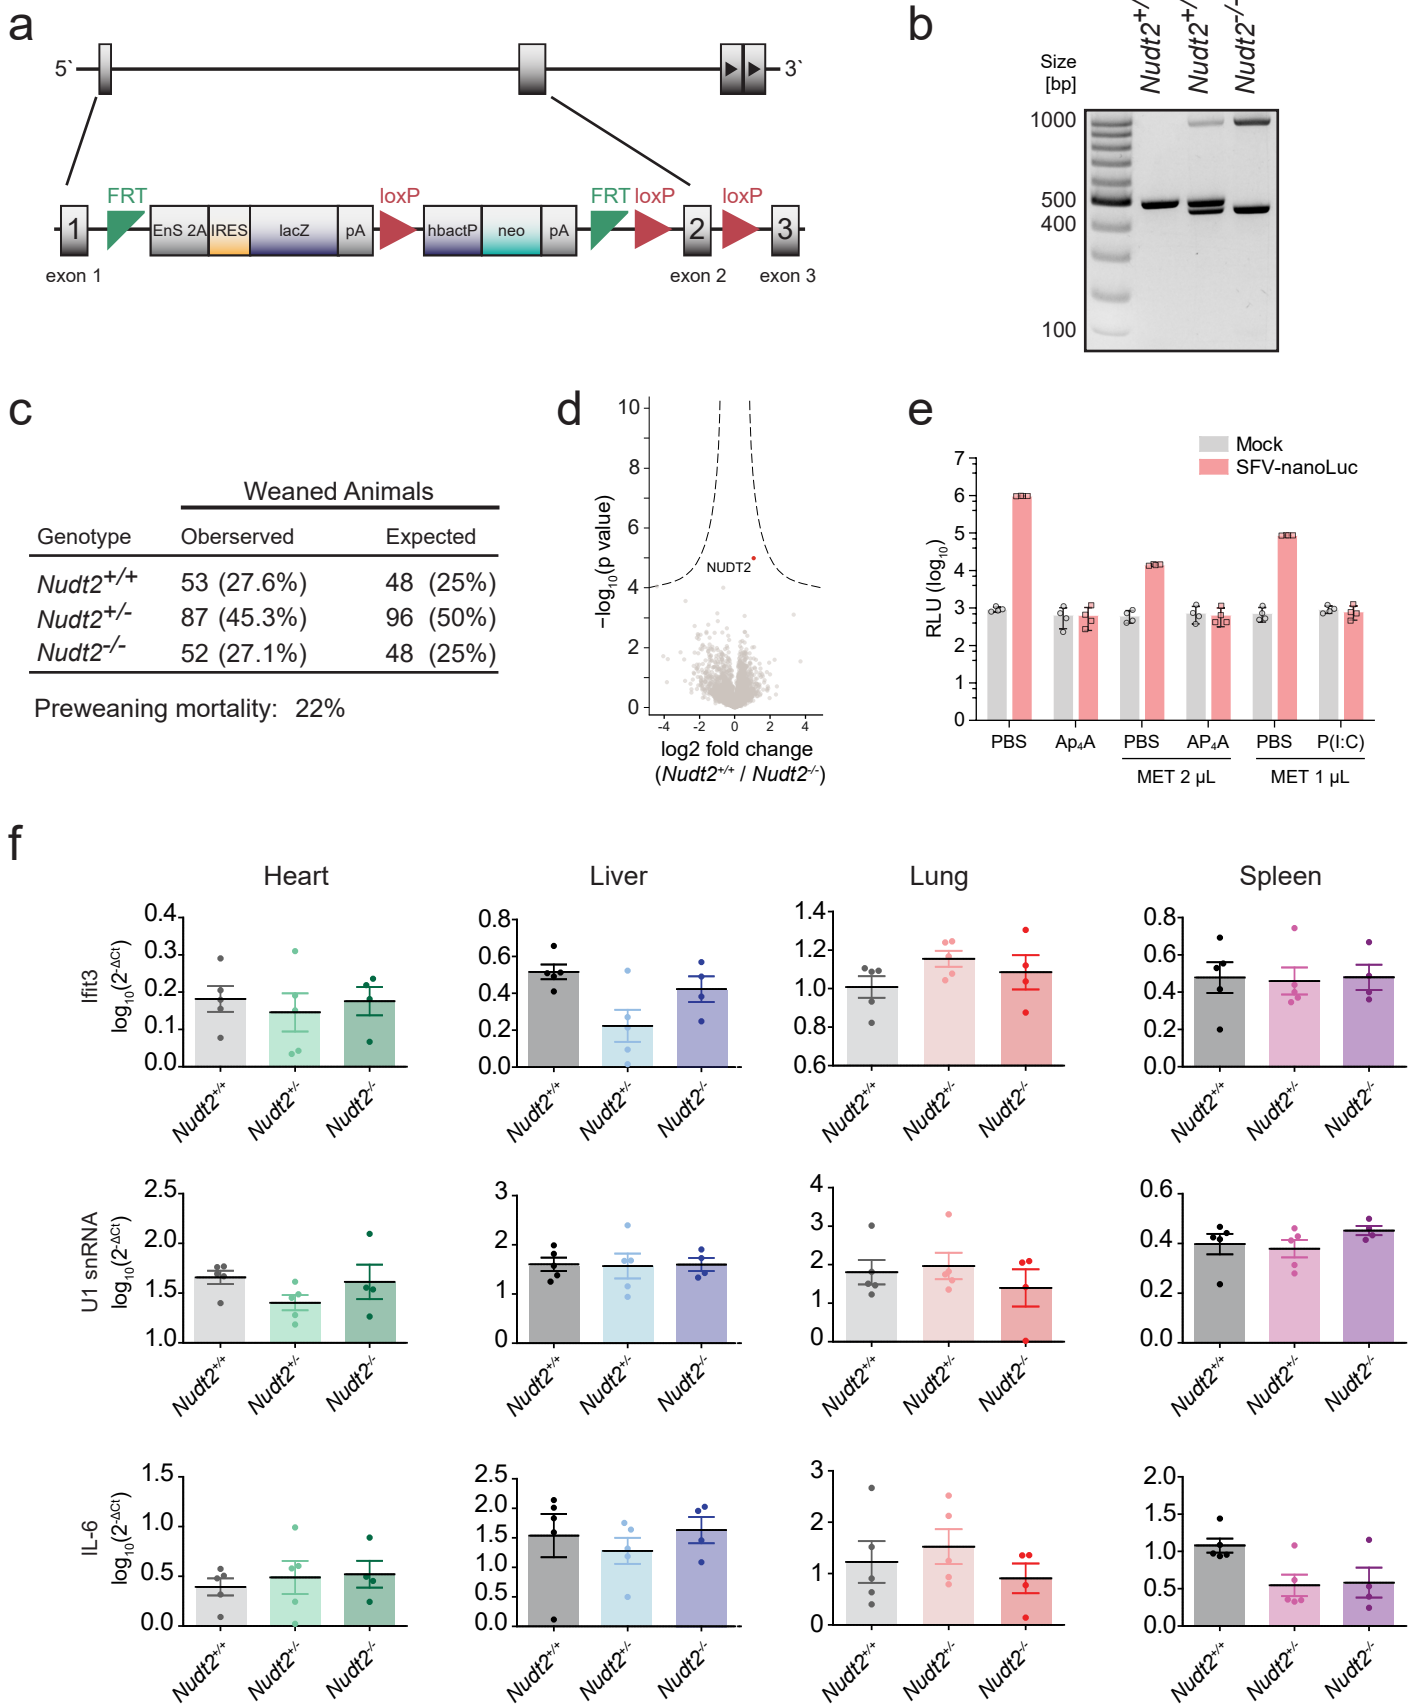

**Supplementary Figure 5 | Characterization of NUDT2 deficient mice.** (a) Schematic overview of *Nudt2* targeting in mice. Depicted is the *Nudt2* gene locus with a tm1a cassette inserted after the first exon and encoding for the lacZ gene, with a splice acceptor, a polyA site, and a neomycin resistance gene. (b) Genotyping PCR of *Nudt2<sup>tm1a/tm1a</sup>* (*Nudt2<sup>-/-</sup>*) mice. PCR amplification results in a wild-type allele detectable at 492 bp, whereas the inserted tm1a cassette is detectable as bands of 417 bp and 912 bp. (c) Mendelian ratios were observed from 192 weaned animals originating from *Nudt2<sup>+/-</sup>* breeding pairs compared to the expected Mendelian distribution. (d) Proteome analysis of bone marrow cells isolated from NUDT2 knockout (*Nudt2<sup>-/-</sup>*) and control mice. Volcano plots display proteins that were significantly up-or down-regulated in cells lacking NUDT2 (right) or wild-type (left) bone marrows (student's *t*-test, FDR  $\leq$  0.05, 6 biological replicates). (e) Influence of extracellular applied or intracellular delivered Ap<sub>4</sub>A or poly(I:C) on the growth of SFV6-2SG Nano-Luc (SFV) at an MOI of 0.0035. Virus growth was assessed by the measurement of renilla luciferase. The bar plot shows the mean  $\pm$  SD of four independent replicates. (f) Levels of Ifit3, Il6, or U1 snRNA in the heart, liver, lung, or spleen of wild-type mice or *Nudt2<sup>-/-</sup>* mice were quantified by RT-qPCR analysis. Data were normalized to murine Tbp RNA. Shown is the mean  $\pm$  SEM. Every dot represents an individual mouse (n = 5 for *Nudt2<sup>+/+</sup>* and *Nudt2<sup>+/-</sup>* and n = 4 for *Nudt2<sup>-/-</sup>*).

# Supplementary Figure 6

a

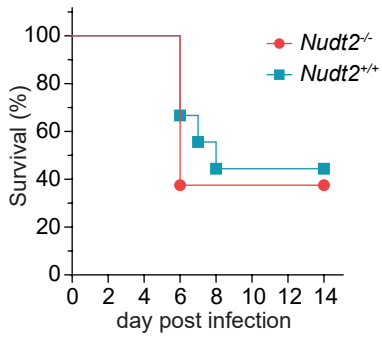

b

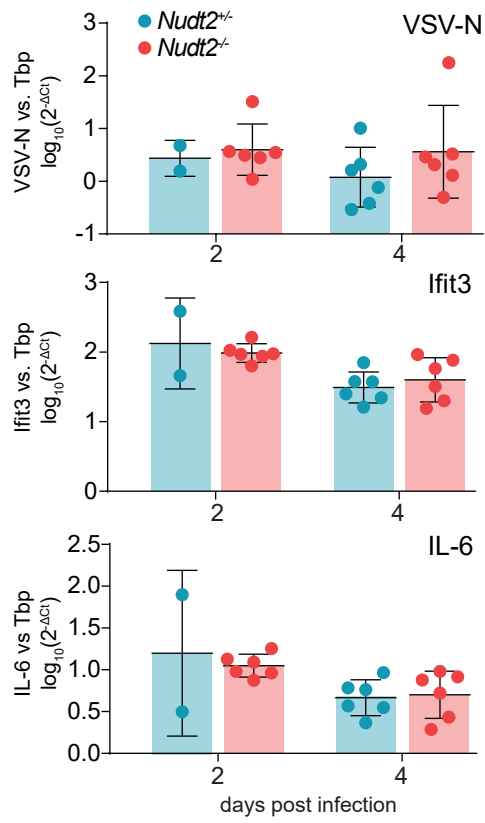

**Supplementary Figure 6 | in vivo infection experiments.** (a) Survival rates of 8–12 week old wild-type (*Nudt2*<sup>+/+</sup>) (9 animals) or NUDT2 knockout (*Nudt2*<sup>-/-</sup>) mice (8 animals) infected intranasally with 5e6 PFU of VSV in 20  $\mu$ L PBS. (b) Viral RNA load and levels of Ifit3 and Il-6 in the cerebrum of wild-type and knockout mice infected with VSV. RNA levels were quantified by RT-qPCR analysis using specific primers for the N-transcript of VSV. Data were normalized to murine Tbp RNA. Shown is the mean  $\pm$  SD. Every dot represents an individual infected mouse (n = 2 for NUDT2<sup>-/-</sup> at 2 days post infection and n = 6 for the other conditions).

# Supplementary Table 1

siRNA target sequences used in the siRNA screen

| Sequence Name       | siRNA target sequence 5'->3' |
|---------------------|------------------------------|
| Hs_NUDT1_3          | CTCCTGCTTCAGAAGAAGAAA        |
| Hs_NUDT1_4          | CCGGGTTTCATCTGGAATTAA        |
| Hs_NUDT1_5          | CCGCGAGGTGGACACGGTCTA        |
| Hs_NUDT2_10         | CAGGCATCAGATGGCATTAT         |
| Hs_NUDT2_7          | TGCCAGGGTCCTGCAGTTATA        |
| Hs_NUDT2_8          | AGGATCCTTGTGGGCCTTCTA        |
| Hs_NUDT5_2          | CAGGCTTGTCAAACTGTACTA        |
| Hs_NUDT5_3          | TACATGGATCCTACTGGTAAA        |
| Hs_NUDT5_6          | TTCCTACGCTCTAGCACTGAA        |
| Hs_NUDT6_5          | CACGCAGAATCGGATTCATCA        |
| Hs_NUDT6_6          | CTGGTTGTACAAGATCGAAAT        |
| Hs_NUDT6_7          | GAGCTGTATTTGATGAAAGTA        |
| Hs_NUDT9_5          | ATGATAATCTTATGCTAGAA         |
| Hs_NUDT9_6          | CACGCTGCAGATCCCATTATA        |
| Hs_NUDT9_3          | AAGATTAGTGCCACACTGAAA        |
| Hs_NUDT12_6         | AGCCGAGCTATTGCACATCAA        |
| Hs_NUDT12_7         | ATGATTGGTTGCTTAGCTCTA        |
| Hs_NUDT12_5         | AAGGTCGGATATTAATAAGT         |
| Hs_NUDT13_6         | CAGGGAACGGAAGCCGTTGAA        |
| Hs_NUDT13_5         | CCACAACGTGTTGATTAACAA        |
| Hs_NUDT13_7         | TAGCCCGGATCAAGTCACTTA        |
| Hs_NUDT14_1         | CAGCGTGACCGTTCTCTTATT        |
| Hs_NUDT14_2         | AAAGGCTTGCATAGCTCCAAA        |
| Hs_NUDT14_4         | CTCCAGACAGACCATGTTCTA        |
| Hs_NUDT15_4         | CAGCAGTACTTCTCACTAA          |
| Hs_NUDT15_6         | CTCAAGAGCCTTTCAAGGGTA        |
| Hs_NUDT15_7         | ATCTGGTGTGATATTGTAATA        |
| Hs_NUDT16_1         | CTCCCTGTTTATATGCGTACA        |
| Hs_NUDT16_2         | CAGGTCAACACTAATACCACT        |
| Hs_NUDT16_3         | ATGTATGAAGGTGGTTCTCAA        |
| Hs_NUDT17_7         | CCCAACCATGGCAGAGGACAA        |
| Hs_NUDT17_6         | CCCGGATCCAACCAAACCCAA        |
| Hs_NUDT17_5         | TACCATCACATTGTTCTGTAT        |
| Hs_NUDT18_1         | CTGGGCCGAGATCACAGTGAT        |
| Hs_NUDT18_2         | AAGCGAGGAGTCCAAAGCTCA        |
| Hs_NUDT18_3         | ATCCTGCACCTGGTTGAACTA        |
| Hs_NUDT19_4         | TACGAAGTGAGAAGACTTGCA        |
| Hs_NUDT19_3         | CACGTTTATCCTAAGAACTCT        |
| Hs_NUDT19_2         | CACCGGATAGTGACATACCAT        |
| Hs_DCP2_5           | CCGGTGATTCATGTTTGTGAA        |
| Hs_DCP2_6           | CTGCTTATAAATGTTATTGTA        |
| Hs_DCP2_1           | CTGGGTTATCAGAGTAATGAA        |
| Hs_NUDT21_5         | CTGCACATATTACAAAGCCTA        |
| Hs_NUDT21_1         | ATCGTGATGAGAAACCTAATA        |
| Hs_NUDT21_3         | CCAAGTGTAGCTGAGCAATTA        |
| Hs_NUDT22_4         | AGGCGCCATCATCCTCTACAA        |
| Hs_NUDT22_1         | CTGGGCCTTACTTCTACCGA         |
| Hs_NUDT22_3         | CCGAGACTTCTGGGCACCAA         |
| Hs_DDX58_6 (RIG-I)  | AACGTTTACAACCAGAATTTA        |
| Hs_DDX58_10 (RIG-I) | TTCTACAGATTTGCTCTACTA        |
| Hs_DDX58_11 (RIG-I) | CTCCTCTACCCGGCTTTAAA         |
| Scrambled (control) | AAGGTAATTGCGCGTGCAACT        |

## Supplementary Table 2

Proteomic analysis of bone-marrow cells derived from *Nudt2*<sup>-/-</sup> animals and *Nudt2*<sup>+/+</sup> littermate controls (WT\_1-3 and KO\_1-3). Three individual mice per genotype were analyzed. Table shows Protein IDs and label free quantification levels (LFQ) of individual measurements. (two-tailed Student's t-test, FDR 0.05, S0 = 0.1)

# Supplementary Table 3

Nucleotide sequences used as templates in in vitro transcriptions

| Sequence Name       | Sequence 5' -> 3'                                                            |
|---------------------|------------------------------------------------------------------------------|
| dsRNA IVT4          | TTGTAATACGACTCACTATAGGGACGCTGACCCAGAAGATCTACTAGAAATAGTAGATCTTCTGGGTCAGCGTCCC |
| dsRNA IVT4_as       | GGGACGCTGACCCAGAAGATCTACTATTTCTAGTAGATCTTCTGGGTCAGCGTCCCTATAGTGAGTCGTATTACAA |
| G0                  | AATTCCTGCAGTAATACGACTCACTATAGGCGCCGCGGTAACGCGGCGCCACGCGGAAACGCGCC            |
| G0_as               | GGCGCGTTTCCGCGTGCGGCCGCGTTACCGCGGCGCCTATAGTGAGTCGTATTACTGCAGGAATT            |
| G8                  | AATTCCTGCAGTAATACGACTCACTATAGGAACAACGGCGCCGCGGTAACGCGGCGCCACGCGGAAACGCGCC    |
| G8_as               | GGCGCGTTTCCGCGTGCGGCCGCGTTACCGCGGCGCCTTGTTCCTATAGTGAGTCGTATTACTGCAGGAATT     |
| G4[GGAA]            | AATTCCTGCAGTAATACGACTCACTATAGGAAGGCGCCGCGGTAACGCGGCGCCACGCGGAAACGCGCC        |
| G4[GGAA]_as         | GGCGCGTTTCCGCGTGCGGCCGCGTTACCGCGGCGCCTTCTATAGTGAGTCGTATTACTGCAGGAATT         |
| G4[GAAA]            | AATTCCTGCAGTAATACGACTCACTATAGAAAGGCGCCGCGGTAACGCGGCGCCACGCGGAAACGCGCC        |
| G4[GAAA]_as         | GGCGCGTTTCCGCGTGCGGCCGCGTTACCGCGGCGCCTTCTATAGTGAGTCGTATTACTGCAGGAATT         |
| G4[GCAA]            | AATTCCTGCAGTAATACGACTCACTATAGCAAGGCGCCGCGGTAACGCGGCGCCACGCGGAAACGCGCC        |
| G4[GCAA]_as         | GGCGCGTTTCCGCGTGCGGCCGCGTTACCGCGGCGCCTTGTCTATAGTGAGTCGTATTACTGCAGGAATT       |
| G4[GUAA]            | AATTCCTGCAGTAATACGACTCACTATAGTAAGGCGCCGCGGTAACGCGGCGCCACGCGGAAACGCGCC        |
| G4[GUAA]_as         | GGCGCGTTTCCGCGTGCGGCCGCGTTACCGCGGCGCCTTACTATAGTGAGTCGTATTACTGCAGGAATT        |
| A8                  | AATTCCTGCAGTAATACGACTCACTATTAGAACAACGGCGCCGCGGTAACGCGGCGCCACGCGGAAACGCGCC    |
| A8_as               | GGCGCGTTTCCGCGTGCGGCCGCGTTACCGCGGCGCCTTGTCTAATAGTGAGTCGTATTACTGCAGGAATT      |
| A4[AGAA]            | AATTCCTGCAGTAATACGACTCACTATTAGAAGGCGCCGCGGTAACGCGGCGCCACGCGGAAACGCGCC        |
| A4[AGAA]_as         | GGCGCGTTTCCGCGTGCGGCCGCGTTACCGCGGCGCCTTCTAATAGTGAGTCGTATTACTGCAGGAATT        |
| A1                  | AATTCCTGCAGTAATACGACTCACTATTAGGCGCCGCGGTAACGCGGCGCCACGCGGAAACGCGCC           |
| A1_as               | GGCGCGTTTCCGCGTGCGGCCGCGTTACCGCGGCGCCTAATAGTGAGTCGTATTACTGCAGGAATT           |
| T7( $\phi$ 2.5)_fwd | AATTCCTGCAGTAATACGACTCACTATAG                                                |
| T7( $\phi$ 6.5)_fwd | AATTCCTGCAGTAATACGACTCACTATTA                                                |
| Ren_IVT_PCR         | TTAAGGACGTCATTATGCTGAGTGAT                                                   |

# Supplementary Table 4

qRT-PCR primers used in this study

| Sequence Name           | Sequence 5'→ 3'            |
|-------------------------|----------------------------|
| hu_NUDT2_fw             | CACTGGACTCCTCCCAAAGG       |
| hu_NUDT2_rv             | TCCTCTTGGGTCTCCCTCAG       |
| hu_NUDT12_fw            | TTGGGCAAACCTTGATCGAC       |
| hu_NUDT12_rv            | CTTCATCCTCCTATGCCAGC       |
| hu_NUDT14_fw            | AAGAGAACGGTCACGCTGTC       |
| hu_NUDT14_rv            | CCGCCTCACCTACCTG           |
| hu_NUDT17_fw            | GACTGTCTTGCTAACCCGAAG      |
| hu_NUDT17_rv            | GGCAGGTGTAGTCCACTCTC       |
| VSV-N_fw                | ATCGGAATATTTGACCTTGTA      |
| VSV-N_rv                | ACTGTTCAATGATCATTTTGC      |
| ms_ActB_fw              | CTCTGGCTCCTAGCACCATGAAGA   |
| ms_ActB_rv              | GTA AACGCAGCTCAGTAACAGTCCG |
| SFVnsp3_fw              | GCAAGAGGCAAACGAACAGA       |
| SFVnsp3_rev             | GGGAAAAGATGAGCAAACCA       |
| HSV-DNA Polymerase I_fw | AGCCTGTACCCAGCATCAT        |
| HSV-DNA Polymerase I_rv | TGGGCCTTACGAAGAACA         |
| Firefly Luc_fw          | CTCACTGAGACTACATCAGC       |
| Firefly Luc_rv          | TCCAGATCCACAACCTTCGC       |
| hu_GAPDH_fw             | GATTCCACCCATGGCAAATTC      |
| hu_GAPDH_rv             | AGCATCGCCCCACTTGATT        |
| Renilla Luc_fw          | GAATTTGCAGCATATCTTGAACCAT  |
| Renilla Luc_rv          | GGATTTACAGAGGCCATGATAA     |
| hu_RPLP0_fw             | GGATCTGCTGCATCTGCTTG       |
| hu_RPLP0_rv             | GCGACCTGGAAGTCCAACCTA      |
| mu_TBP_fw               | CCTTACCAATGACTCCTATGAC     |
| mu_TBP_rv               | CAAGTTTACAGCCAAGATTCA      |
| mu>Ifit3_fw             | TGGTCATGTGCCGTTACAGG       |
| mu>Ifit3_rv             | GCTGCGAGGTCTTCAGACTT       |
| mu>Ifi6_fw              | TAGTCCTTCTACCCCAATTTC      |
| mu>Ifi6_rv              | TTGGTCCTTAGCCACTCCTTC      |
| U1 RNA_fw               | ACTTACCTGGCAGGGGAGATAC     |
| U1 RNA_rv               | ACATCCGGAGTGCAATGGATAA     |



## Supplementary Table 5

Nucleotide guide sequences cloned in pLentiCRISPRv2

| Sequence Name | Sequence 5' -> 3'     |
|---------------|-----------------------|
| NUDT2_gRNA1   | ATGAGCACCAAGCCTACCGC  |
| NUDT2_gRNA2   | AATTGCATTGTTGTCCACTT  |
| NUDT2_gRNA3   | TAACTAGGCCATGTGGAACC  |
| NUDT2_gRNA4   | CATCAGATGGCATTTCATCAC |
| NUDT2_gRNA5   | TCTCCTTGAAGTGAAGCAAC  |
| NUDT2_gRNA6   | CCATTATTGAGGGGTCAAA   |
| XRN1_gRNA1    | TTAAGAGAAGAAGTTCGATT  |
| XRN1_gRNA2    | TAAAACGCCTCCCACGCTGC  |
| XRN1_gRNA3    | GCTTGGATTAACAAGTCATG  |
| XRN1_gRNA4    | TAATGCGAAACAACACCTCC  |
| XRN1_gRNA5    | GTATCCCTGTCTCAGCGAAG  |
| XRN1_gRNA6    | TTTCAACACTTCGCTGAGAC  |
